# Supplementary material
Source: PubMed Central journal article supplement (PMC7643251)
Supplement: ao0c04092_si_001.pdf [file ao0c04092_si_001.pdf]

## Supporting Information

### Application of an activity-based probe to determine proteolytic activity of cell surface cathepsin G by mass cytometry data acquisition

Fabian Gärtner<sup>1</sup>, Uwe Knippschild<sup>1</sup>, and Timo Burster<sup>2\*</sup>

<sup>1</sup>Department of General and Visceral Surgery, Surgery Center; Ulm University Medical Center, 89081 Ulm, Germany; <sup>2</sup>Department of Biology, School of Sciences and Humanities, Nazarbayev University, Kabanbay Batyr Ave., 53, Nur-Sultan, 010000, Kazakhstan Republic

\*Corresponding author

**S1: CatG activity is plotted as intensity values.**

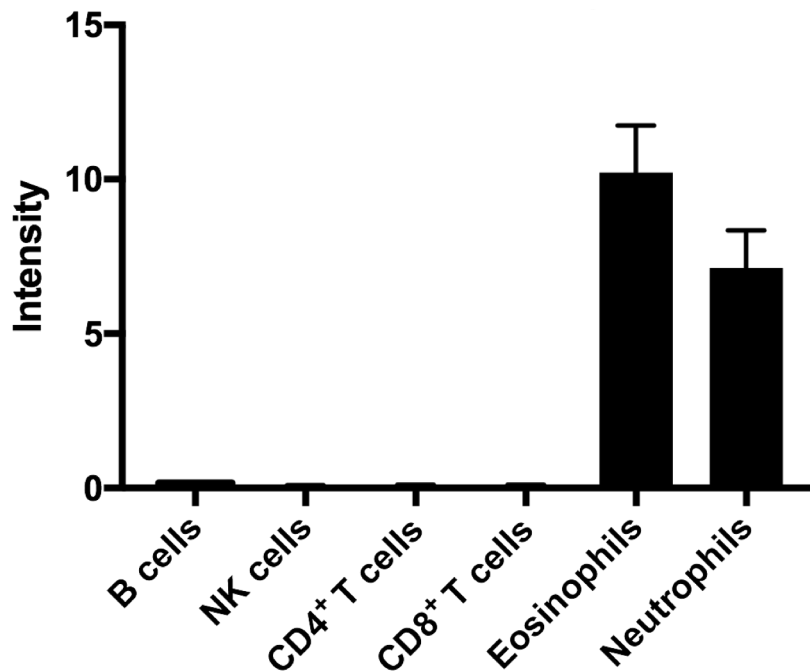

**Figure S1:** Cell surface CatG activity, detected on B cell, NK cells, CD4+ T cells, CD8+ T cells, eosinophils, and neutrophils, is summarized in the bar diagram and expressed as intensity.
